# Supplementary material
Source: PubMed Central journal article supplement (PMC2755501)
Supplement: NIHMS142852-supplement-1_si_001.pdf [file NIHMS142852-supplement-1_si_001.pdf]

## SUPPORTING INFORMATION FOR

### **Kinetics and Activation Parameters for Oxidations of Styrene by Compounds I from Cytochrome P450<sub>BM-3</sub> (CYP102A1) Heme Domain and from CYP119**

Xinting Yuan, Qin Wang, John H. Horner, Xin Sheng, Martin Newcomb

*Department of Chemistry, University of Illinois at Chicago, Chicago, Illinois 60607*

#### CONTENTS

|                                                                                                                                 |         |
|---------------------------------------------------------------------------------------------------------------------------------|---------|
| Figure S1. UV-visible spectra of CYP119 species                                                                                 | Page S2 |
| Figure S2. Kinetic traces for CYP119 Compound I                                                                                 | Page S2 |
| Figure S3. Kinetic traces for CYP102 <sub>HD</sub> Compound I                                                                   | Page S3 |
| Table S1. Rate constants for reactions of styrene with CYP102 <sub>HD</sub> Compound I                                          | Page S4 |
| Table S2. Rate constants for reactions of styrene with CYP119 Compound I                                                        | Page S5 |
| Table S3. Rate constants for reactions of C <sub>6</sub> H <sub>5</sub> CD <sub>2</sub> OH with CYP102 <sub>HD</sub> Compound I | Page S6 |

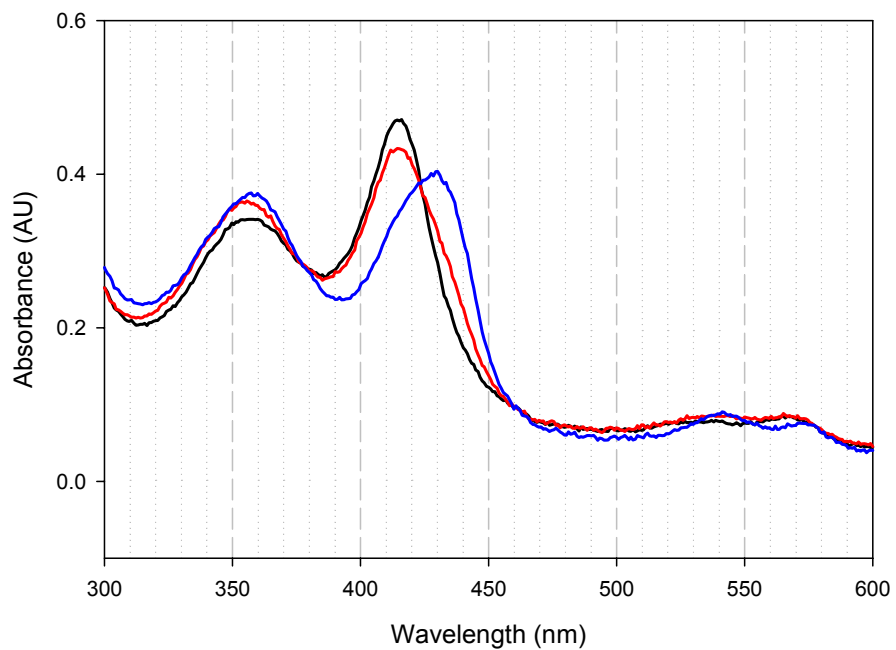

**Figure S1.** UV-visible spectra of CYP119 resting enzyme (black line), Compound II (blue line), and Compound I (red line).

---

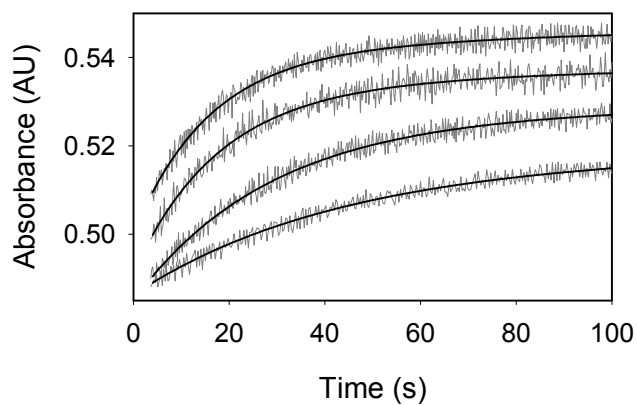

**Figure S2.** Representative kinetic traces monitored at 416 nm and fits for reactions of CYP119 Compound I with styrene at  $-50\text{ }^{\circ}\text{C}$ . The concentrations of styrene were, from the top, 6.5, 5.0, 2.0, and 1.0 mM.

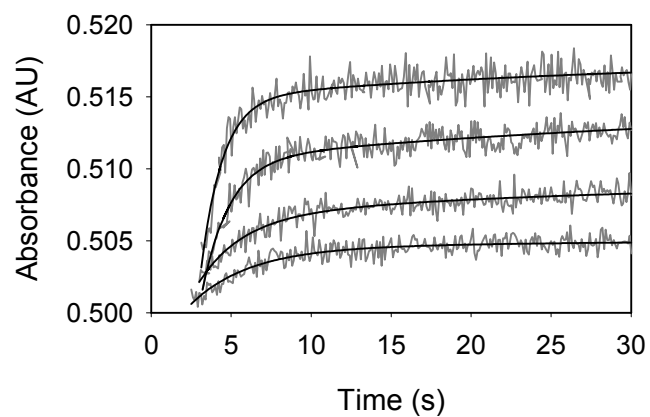

**Figure S3.** Representative kinetic traces monitored at 416 nm and fits for reactions of CYP102<sub>HD</sub> Compound I with styrene at -20 °C. The concentrations of styrene were, from the top, 3.0, 2.0, 1.0, and 0.5 mM.

**Table S1. Observed rate constants for reactions of styrene with CYP102<sub>HD</sub> Compound I.**

---

| Temp (°C) <sup>b</sup> | [styrene] (mM) | $k_{\text{obs}}$ (s <sup>-1</sup> ) <sup>c</sup> |
|------------------------|----------------|--------------------------------------------------|
| -35                    | 0              | <0.001                                           |
|                        | 1.0            | 0.10 ± 0.02                                      |
|                        | 2.0            | 0.14 ± 0.01                                      |
|                        | 4.0            | 0.16 ± 0.02                                      |
| -30                    | 0              | 0.0015 ± 0.0002                                  |
|                        | 0.5            | 0.13 ± 0.03                                      |
|                        | 1.0            | 0.18 ± 0.02                                      |
|                        | 2.0            | 0.25 ± 0.03                                      |
|                        | 4.0            | 0.30 ± 0.02                                      |
| -20                    | 0              | 0.0056 ± 0.0003                                  |
|                        | 0.5            | 0.28 ± 0.05                                      |
|                        | 1.0            | 0.36 ± 0.05                                      |
|                        | 2.0            | 0.59 ± 0.04                                      |
|                        | 3.0            | 0.74 ± 0.06                                      |
| -10                    | 0              | 0.025 ± 0.009                                    |
|                        | 0.25           | 0.21 ± 0.02                                      |
|                        | 0.5            | 0.43 ± 0.03                                      |
|                        | 1.0            | 0.73 ± 0.05                                      |

---

<sup>a</sup>In 1:1 solutions of glycerol and 100 mM potassium phosphate buffer (pH 7.4). <sup>b</sup>± 0.2 °C.

<sup>c</sup>Errors are 1σ.

---

**Table S2. Observed rate constants for reactions of styrene with CYP119 Compound I.**

| Temp (°C) <sup>b</sup> | [styrene] (mM) | $k_{\text{obs}}$ (s <sup>-1</sup> ) <sup>c</sup> |
|------------------------|----------------|--------------------------------------------------|
| -50                    | 0              | 0.0031 ± 0.0006                                  |
|                        | 1.0            | 0.024 ± 0.008                                    |
|                        | 2.0            | 0.035 ± 0.009                                    |
|                        | 3.0            | 0.046 ± 0.008                                    |
|                        | 5.0            | 0.058 ± 0.010                                    |
|                        | 6.0            | 0.063 ± 0.007                                    |
|                        | 6.5            | 0.064 ± 0.008                                    |
| -35                    | 0              | 0.023 ± 0.008                                    |
|                        | 1.0            | 0.142 ± 0.016                                    |
|                        | 2.0            | 0.24 ± 0.05                                      |
|                        | 3.0            | 0.30 ± 0.04                                      |
|                        | 4.0            | 0.37 ± 0.06                                      |
|                        | 6.0            | 0.44 ± 0.08                                      |
|                        | 6.5            | 0.47 ± 0.09                                      |
| -25                    | 0              | 0.077 ± 0.011                                    |
|                        | 1.0            | 0.312 ± 0.038                                    |
|                        | 2.0            | 0.517 ± 0.076                                    |
|                        | 3.0            | 0.680 ± 0.086                                    |

<sup>a</sup>In 1:1 solutions of glycerol and 100 mM potassium phosphate buffer (pH 7.4). <sup>b</sup>± 0.2 °C.

<sup>c</sup>Errors are 1σ.

**Table S3. Observed rate constants for reactions of benzyl alcohol- $d_2$  with CYP102<sub>HD</sub>****Compound I.<sup>a</sup>**

---

| Temp (°C) <sup>b</sup> | [BA- $d_2$ ] (mM) | $k_{\text{obs}}$ (s <sup>-1</sup> ) <sup>c</sup> |
|------------------------|-------------------|--------------------------------------------------|
| -20                    | 0                 | 0.0056 ± 0.0003                                  |
|                        | 0.3               | 0.20 ± 0.02                                      |
|                        | 0.5               | 0.36 ± 0.05                                      |
|                        | 1.0               | 0.57 ± 0.05                                      |

---

<sup>a</sup>The substrate was C<sub>6</sub>H<sub>5</sub>CD<sub>2</sub>OH (see ref 17 in text). Reactions were conducted in 1:1 solutions of glycerol and 100 mM potassium phosphate buffer (pH 7.4) as described in the Experimental Section of the text and in ref 17 of the text. <sup>b</sup>± 0.2 °C. <sup>c</sup>Errors are 1σ.

---
